# Supplementary material for: Epidemiological dynamics of SARS-CoV-2 VOC Gamma in Rio de Janeiro, Brazil
Source: bioRxiv or medRxiv preprint supplement (doi:10.1101/2021.07.01.21259404), 2021-07-06

# VOC Gamma Introductions in Rio de Janeiro

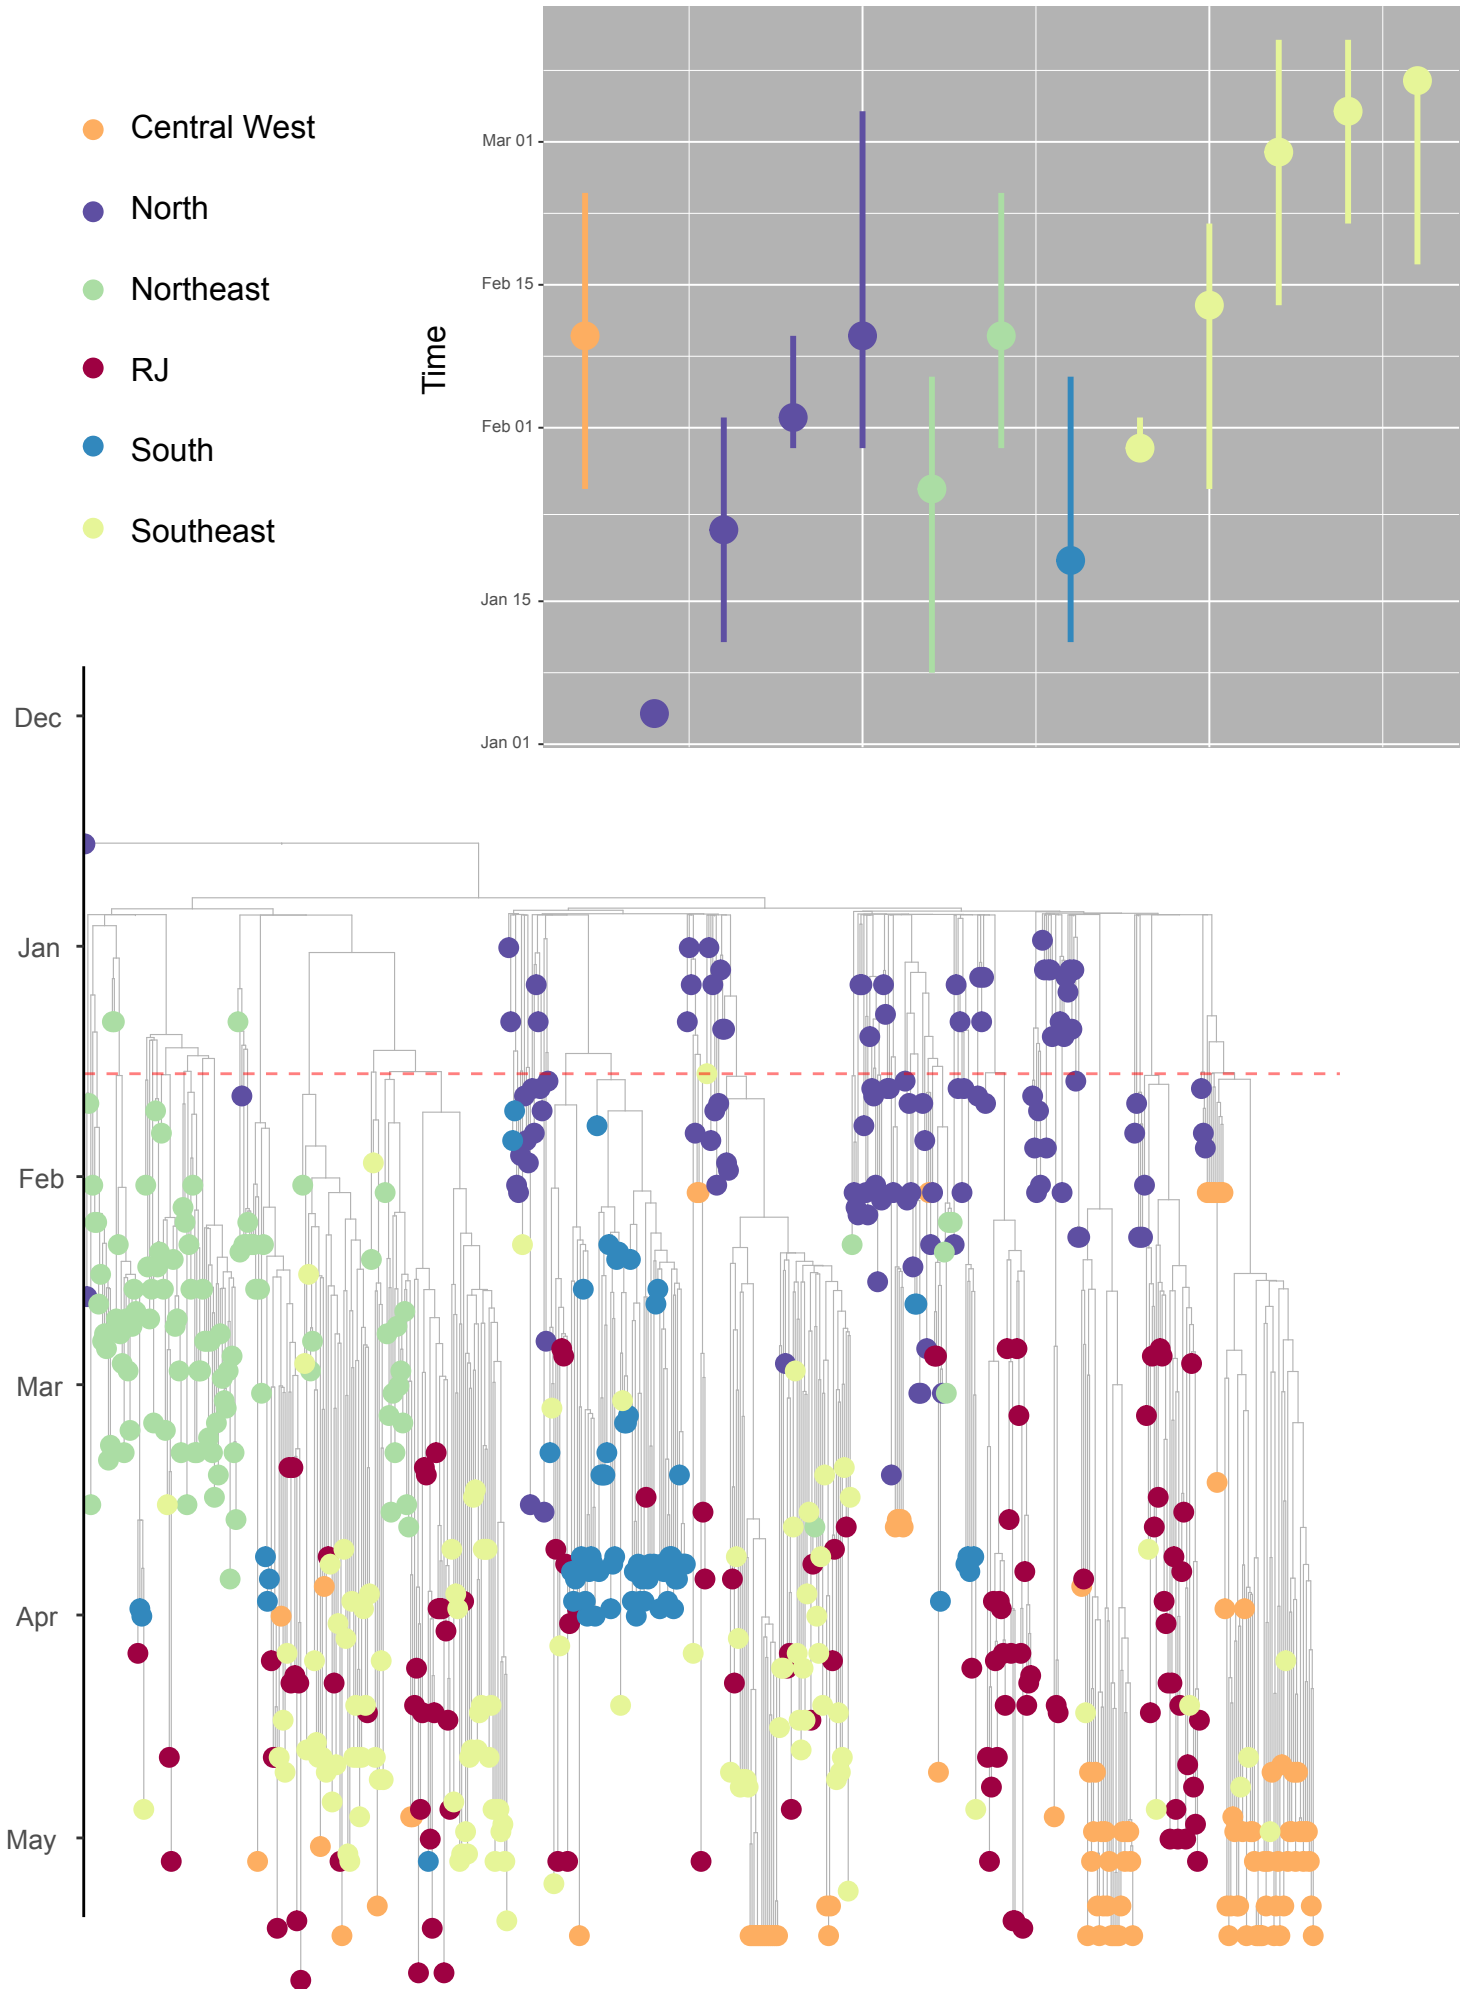

Supplement: Supplementary file [file media-1.pdf]
