# Supplementary material for: Epidemiological dynamics of SARS-CoV-2 VOC Gamma in Rio de Janeiro, Brazil
Source: bioRxiv or medRxiv preprint supplement (doi:10.1101/2021.07.01.21259404), 2021-07-06
Supplement: Supplementary file [file media-7.pdf]

**Supplementary Table S1:** Results from BEAST models based on the coalescent exponential growth and non-parametric coalescent skygrid tree priors.

| Clade   | Exponential  |                        |                        |              | Skygrid      |                        |                        |              |
|---------|--------------|------------------------|------------------------|--------------|--------------|------------------------|------------------------|--------------|
|         | tMRCA median | Lower boundary 95% HPD | Upper boundary 95% HPD | Location     | tMRCA median | Lower boundary 95% HPD | Upper boundary 95% HPD | Location     |
| clade1  | 2021.15      | 2021.13                | 2021.19                | Southeast    | 2021.01      | 2021.01                | 2021.01                | North        |
| clade2  | 2021.06      | 2021.04                | 2021.12                | Southeast    | 2021.11      | 2021.08                | 2021.17                | North        |
| clade3  | 2021.14      | 2021.09                | 2021.17                | Southeast    | 2021.06      | 2021.03                | 2021.09                | North        |
| clade4  | 2021.17      | 2021.14                | 2021.17                | Northeast    | 2021.09      | 2021.08                | 2021.11                | North        |
| clade5  | 2021.18      | 2021.13                | 2021.21                | Southeast    | 2021.18      | 2021.13                | 2021.18                | Southeast    |
| clade6  | 2021.11      | 2021.08                | 2021.16                | Northeast    | 2021.17      | 2021.14                | 2021.19                | Southeast    |
| clade7  | 2021.02      | 2021.02                | 2021.02                | Northeast    | 2021.12      | 2021.07                | 2021.14                | Southeast    |
| clade8  | 2021.15      | 2021.14                | 2021.21                | South        | 2021.16      | 2021.12                | 2021.19                | Southeast    |
| clade9  | 2021.06      | 2021.06                | 2021.1                 | Northeast    | 2021.11      | 2021.07                | 2021.15                | Central West |
| clade10 | 2021.06      | 2021.05                | 2021.11                | Northeast    | 2021.05      | 2021.03                | 2021.10                | South        |
| clade11 | 2021.10      | 2021.07                | 2021.11                | Central West | 2021.08      | 2021.08                | 2021.09                | Southeast    |
| clade12 | 2021.10      | 2021.09                | 2021.11                | Northeast    | 2021.07      | 2021.02                | 2021.10                | Northeast    |
| clade13 | 2021.09      | 2021.08                | 2021.15                | Central West | 2021.11      | 2021.08                | 2021.15                | Northeast    |

tMRCA = time for the Most Recent Common Ancestor

HPD = Highest Posterior Density.
